# Supplementary material
Source: MDPI journal article supplement (https://www.mdpi.com/2312-7481/9/11/229)
Supplement: s1 [file s1]

## Supplementary Information

# Honey-like odor meets single-ion magnet: synthesis, crystal structure, and magnetism of cobalt(II) complex with aromatic trans-cinnamic acid

Petr Halaš<sup>1</sup>, Ivan Nemec<sup>1</sup> and Radovan Herchel<sup>1,\*</sup>

Department of Inorganic Chemistry, Faculty of Science, Palacký University, 17. listopadu 12, CZ-771 46 Olomouc, Czech Republic

\* Correspondence: radovan.herchel@upol.cz

### Table of contents

**Figure S1.** X-ray powder diffraction of compound  $1 \cdot \frac{1}{2} \text{Me}_2\text{CO}$  measured at room temperature and compared to the simulation calculated from SC-XRD data measured at 293 K..

**Figure S2.** FT-IR spectrum of compound  $1 \cdot \frac{1}{2} \text{Me}_2\text{CO}$ .

**Figure S3.** Assignment of energy levels of d-orbitals of compound **1**.

**Figure S4.** D-tensor (NEVPT2) of compound **1**. Axes: x – red, y – green, z – blue.

**Figure S5.** Calculated 3D magnetization of compound **1** at  $T = 2 \text{ K}$  and  $B = 0.1 \text{ T}$ .

**Figure S6.** The results of simultaneous TG/DSC thermal analysis of  $1 \cdot \frac{1}{2} \text{Me}_2\text{CO}$  ( $5 \text{ }^\circ\text{C/min}$ ,  $50 \text{ mL/min}$  air atmosphere) depicted as TG (in blue) and DSC (green) curves; TG = thermogravimetry, DSC = differential scanning calorimetry.

**Figure S7.** Top – compound  $1 \cdot \frac{1}{2} \text{Me}_2\text{CO}$  before (blue) and after (red) irradiation. Bottom – compound **1** before (blue) and after (red) irradiation.

**Table S1.** The parameters of one-component Debye's model used to analyze the field-dependent AC susceptibility data of  $1 \cdot \frac{1}{2} \text{Me}_2\text{CO}$ .

**Table S2.** The parameters of one-component Debye's model used to analyze the temperature-dependent AC susceptibility data of  $1 \cdot \frac{1}{2} \text{Me}_2\text{CO}$ .

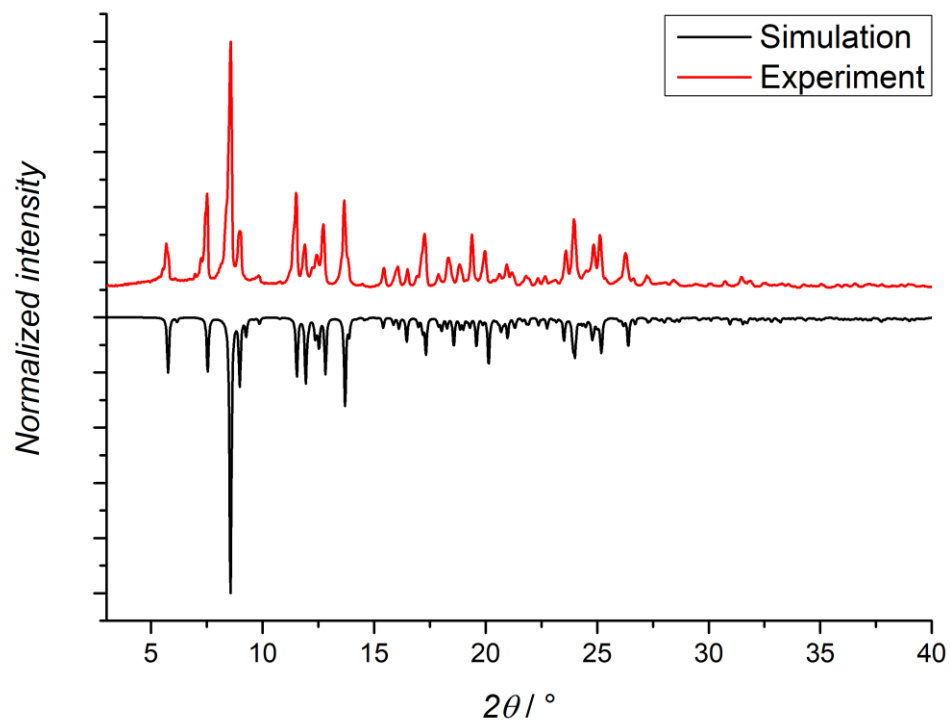

**Figure S1.** X-ray powder diffraction of compound  $1 \cdot \frac{1}{2} \text{Me}_2\text{CO}$  measured at room temperature and compared to the simulation calculated from SC-XRD data measured at 293 K.

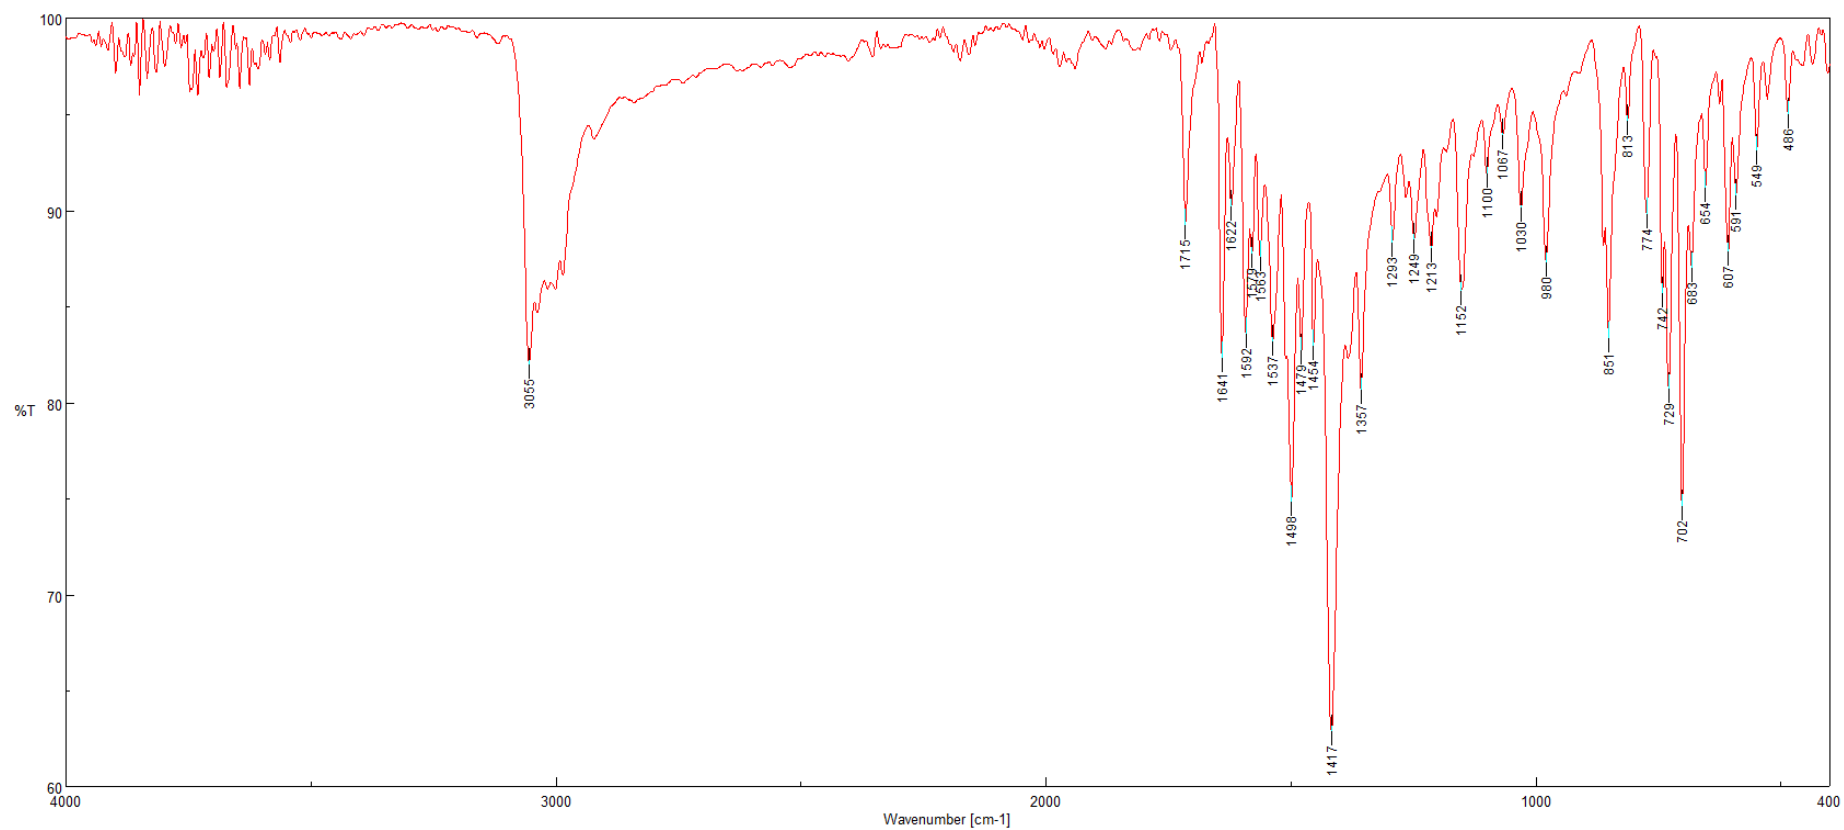

**Figure S2.** FT-IR spectrum of compound  $1 \cdot \frac{1}{2} \text{Me}_2\text{CO}$ .

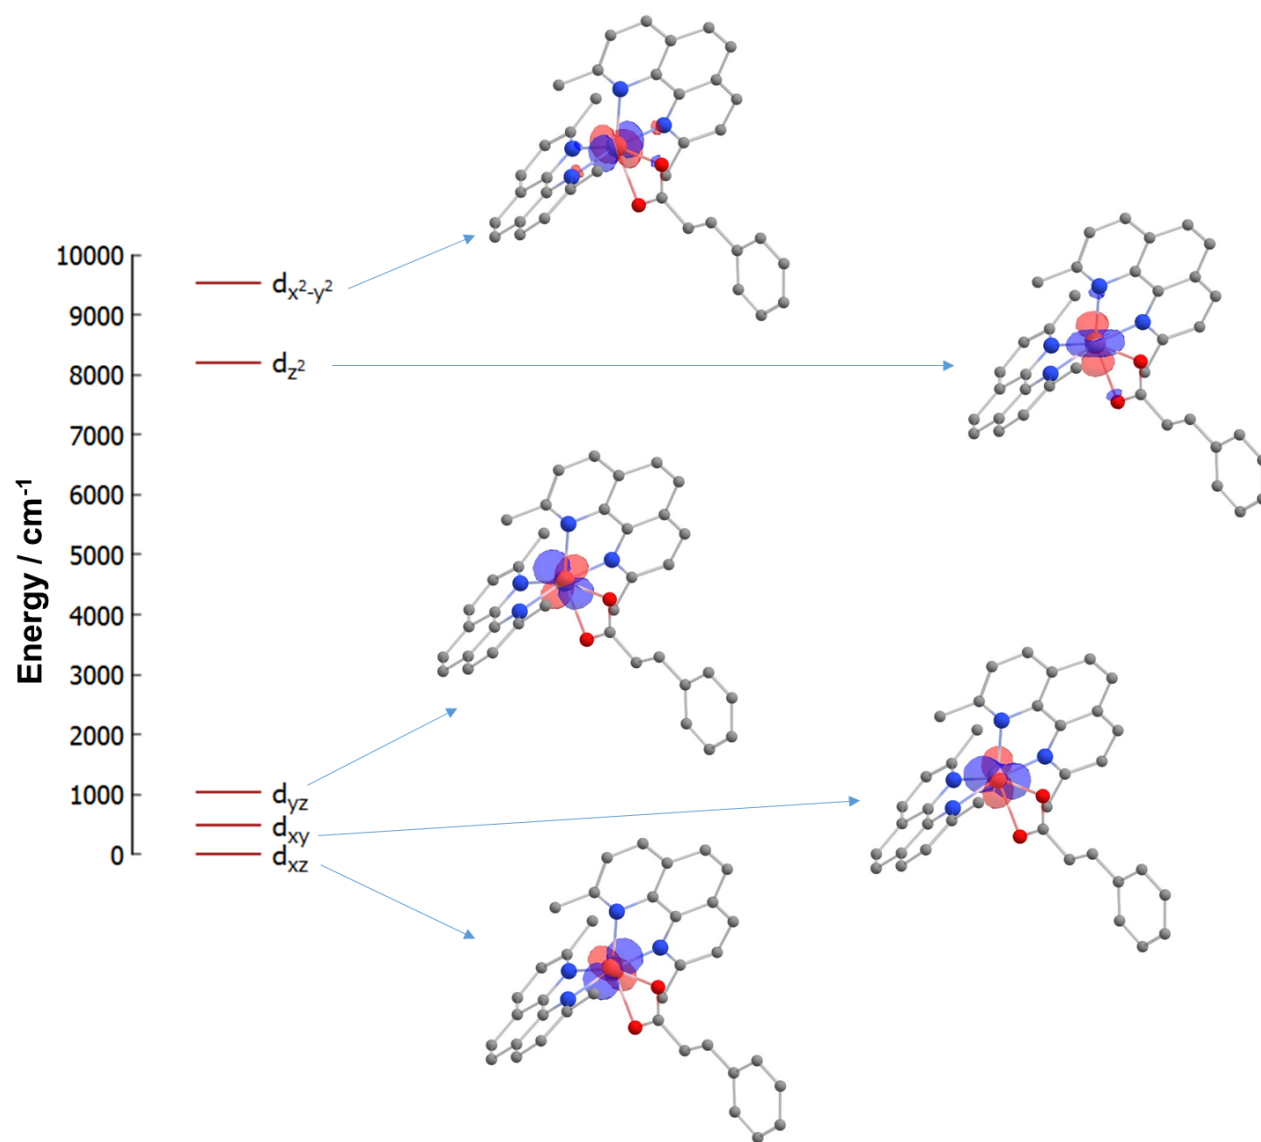

Figure S3. Assignment of energy levels of d-orbitals of compound 1.

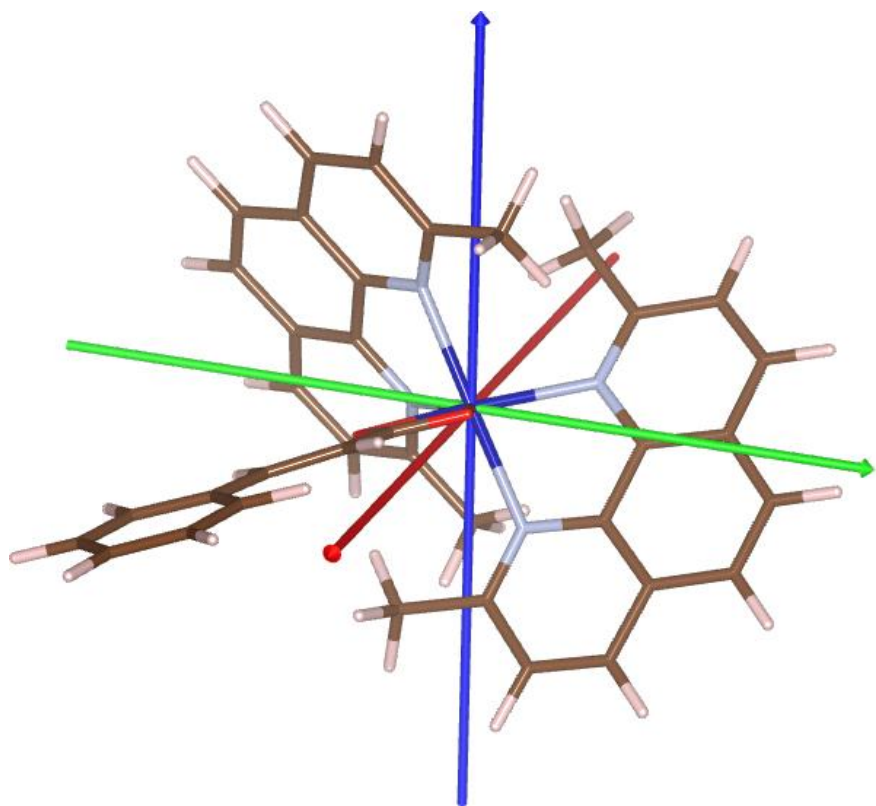

**Figure S4.** D-tensor (NEVPT2) of compound **1**. Axes: x – red, y – green, z – blue.

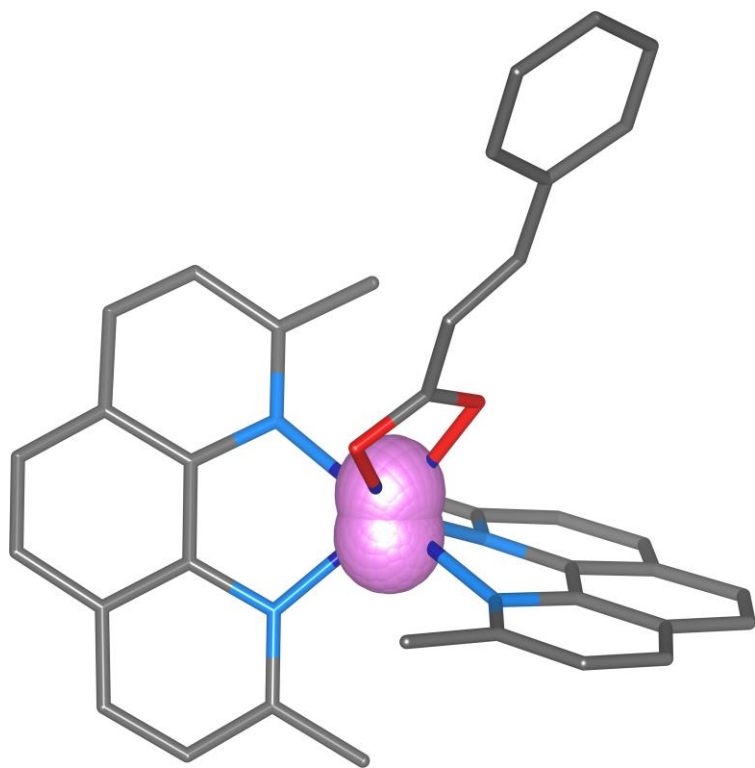

**Figure S5.** CASSCF/NEVPT2/SINGLE\_ANISO calculated the three-dimensional molar magnetization of compound **1** at  $T = 2$  K and  $B = 0.1$  T.

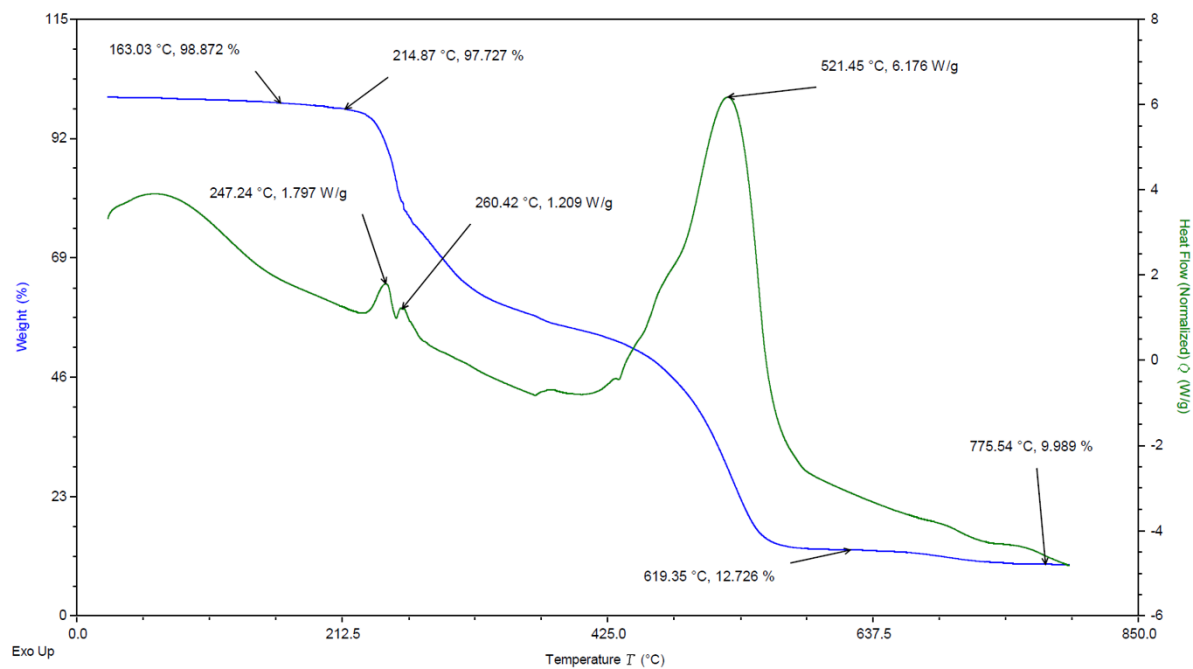

**Figure S6.** The results of simultaneous TG/DSC thermal analysis of  $1\frac{1}{2}\text{Me}_2\text{CO}$  (5 °C/min, 50 mL/min air atmosphere) are depicted as TG (in blue) and DSC (green) curves; TG = thermogravimetry, DSC = differential scanning calorimetry.

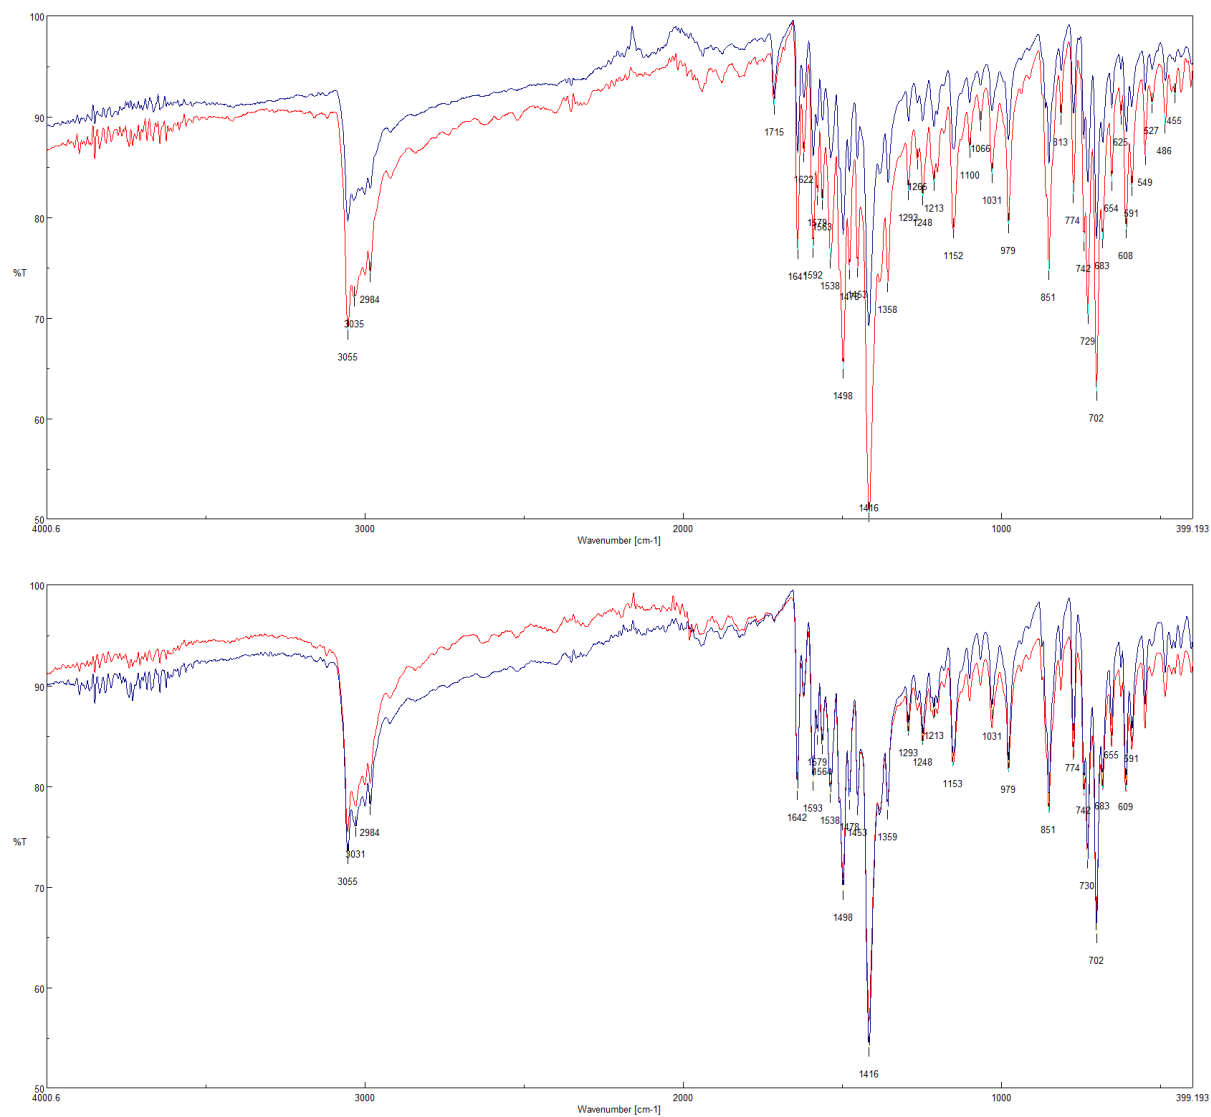

**Figure S7.** Top – compound 1·½Me<sub>2</sub>CO before (blue) and after (red) irradiation. Bottom – compound 1 before (blue) and after (red) irradiation.



**Table S1.** The parameters of one-component Debye's model used to analyze the field-dependent AC susceptibility data of  $1\cdot\frac{1}{2}\text{Me}_2\text{CO}$ .<sup>a</sup>

| $B$ (T) | $T$ (K) | $c_s$ ( $10^{-6} \text{ m}^3\text{mol}^{-1}$ ) | $c_T$ ( $10^{-6} \text{ m}^3\text{mol}^{-1}$ ) | $a$          | $t$ ( $10^{-6} \text{ s}$ ) |
|---------|---------|------------------------------------------------|------------------------------------------------|--------------|-----------------------------|
| 0.015   | 2.00    | 9.590(0.031)                                   | 11.603(0.013)                                  | 0.016(0.016) | 773.176(19.227)             |
| 0.020   | 2.00    | 8.045(0.027)                                   | 11.609(0.011)                                  | 0.037(0.008) | 762.189( 9.545)             |
| 0.030   | 2.00    | 5.475(0.017)                                   | 11.598(0.007)                                  | 0.050(0.003) | 810.255( 3.901)             |
| 0.040   | 2.00    | 3.818(0.021)                                   | 11.575(0.009)                                  | 0.051(0.003) | 856.948( 3.955)             |
| 0.050   | 2.00    | 2.780(0.021)                                   | 11.542(0.009)                                  | 0.054(0.002) | 884.414( 3.659)             |
| 0.060   | 2.00    | 2.103(0.026)                                   | 11.495(0.012)                                  | 0.056(0.003) | 896.774( 4.456)             |
| 0.070   | 2.00    | 1.626(0.032)                                   | 11.403(0.014)                                  | 0.059(0.003) | 894.027( 5.161)             |
| 0.080   | 2.00    | 1.299(0.036)                                   | 11.340(0.016)                                  | 0.064(0.004) | 883.041( 5.572)             |
| 0.090   | 2.00    | 1.062(0.044)                                   | 11.254(0.019)                                  | 0.067(0.004) | 865.188( 6.602)             |
| 0.100   | 2.00    | 0.836(0.066)                                   | 11.151(0.028)                                  | 0.075(0.006) | 839.095( 9.553)             |
| 0.125   | 2.00    | 0.480(0.108)                                   | 10.867(0.043)                                  | 0.092(0.010) | 769.056(14.259)             |
| 0.150   | 2.00    | 0.174(0.195)                                   | 10.533(0.070)                                  | 0.120(0.017) | 693.524(23.661)             |
| 0.200   | 2.00    | 0.001(0.548)                                   | 10.207(0.151)                                  | 0.203(0.041) | 547.952(58.265)             |

<sup>a</sup> the standard deviations are reported in parentheses.**Table S2.** The parameters of one-component Debye's model used to analyze the temperature-dependent AC susceptibility data of  $1\cdot\frac{1}{2}\text{Me}_2\text{CO}$ .<sup>a</sup>

| $B$ (T) | $T$ (K) | $c_s$ ( $10^{-6} \text{ m}^3\text{mol}^{-1}$ ) | $c_T$ ( $10^{-6} \text{ m}^3\text{mol}^{-1}$ ) | $a$          | $t$ ( $10^{-6} \text{ s}$ ) |
|---------|---------|------------------------------------------------|------------------------------------------------|--------------|-----------------------------|
| 0.090   | 1.80    | 1.089(0.117)                                   | 12.504(0.045)                                  | 0.089(0.011) | 1205.769(4.534)             |
| 0.090   | 2.00    | 1.078(0.111)                                   | 11.317(0.037)                                  | 0.070(0.011) | 862.441(6.745)              |
| 0.090   | 2.20    | 1.034(0.083)                                   | 10.322(0.023)                                  | 0.055(0.008) | 635.844(9.260)              |
| 0.090   | 2.40    | 0.995(0.102)                                   | 9.561(0.024)                                   | 0.048(0.010) | 487.527(8.911)              |
| 0.090   | 2.60    | 0.980(0.098)                                   | 8.866(0.019)                                   | 0.038(0.009) | 379.035(6.751)              |
| 0.090   | 2.80    | 0.963(0.080)                                   | 8.271(0.013)                                   | 0.032(0.007) | 300.756(4.562)              |
| 0.090   | 3.00    | 0.989(0.085)                                   | 7.749(0.011)                                   | 0.023(0.007) | 243.077(4.075)              |
| 0.090   | 3.20    | 1.019(0.147)                                   | 7.293(0.015)                                   | 0.016(0.012) | 199.131(6.089)              |

|       |      |              |              |              |                |
|-------|------|--------------|--------------|--------------|----------------|
| 0.090 | 3.40 | 1.048(0.155) | 6.888(0.013) | 0.012(0.012) | 164.798(5.639) |
| 0.090 | 3.60 | 1.093(0.108) | 6.530(0.007) | 0.008(0.008) | 137.332(3.495) |
| 0.090 | 3.80 | 1.139(0.166) | 6.187(0.008) | 0.001(0.012) | 115.359(4.807) |
| 0.090 | 4.00 | 1.158(0.131) | 5.902(0.005) | 0.001(0.008) | 96.133(3.343)  |
| 0.090 | 4.20 | 1.156(0.314) | 5.639(0.008) | 0.001(0.018) | 79.653(7.035)  |
| 0.090 | 4.40 | 1.146(0.301) | 5.393(0.005) | 0.001(0.015) | 65.920(5.836)  |
| 0.090 | 4.60 | 1.163(0.470) | 5.168(0.006) | 0.001(0.021) | 54.933(7.986)  |
| 0.090 | 4.80 | 1.268(0.486) | 4.964(0.005) | 0.001(0.021) | 46.694(7.528)  |
| 0.090 | 5.00 | 0.881(0.805) | 4.769(0.004) | 0.001(0.024) | 34.334(8.519)  |

<sup>a</sup> the standard deviations are reported in parentheses.
